# Supplementary material
Source: Copernicus journal article supplement (doi:10.5194/cp-22-975-2026)
Supplement: Supplementary file [file cp-22-975-2026-supplement-title-page.pdf › cp-22-975-2026-supplement-title-page.pdf]

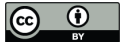

*Supplement of*

**Climate change drove Late Miocene to Pliocene rise and fall of C<sub>4</sub> vegetation at the crossroads of Africa and Eurasia (Anatolia, Türkiye)**

**Maud J. M. Meijers et al.**

*Correspondence to:* Maud J. M. Meijers ([maud.meijers@uni-graz.at](mailto:maud.meijers@uni-graz.at))

- [cp-22-975-2026-supplement-title-page.pdf](#)
- [Supplementary\\_Materials.pdf](#)
- [Table\\_S1.xlsx](#)
- [Table\\_S2.xlsx](#)
- [Table\\_S3.xlsx](#)

The copyright of individual parts of the supplement might differ from the article licence.
